# Supplementary figures and images for: Development of a lupus nephritis suboptimal response prediction tool using renal histopathological and clinical laboratory variables at the time of diagnosis
Source: PubMed Central journal article supplement — Lupus Sci Med. 2021 Aug 24;8(1):e000489. doi: 10.1136/lupus-2021-000489 (PMC8386213; doi:10.1136/lupus-2021-000489), 2021-08-24

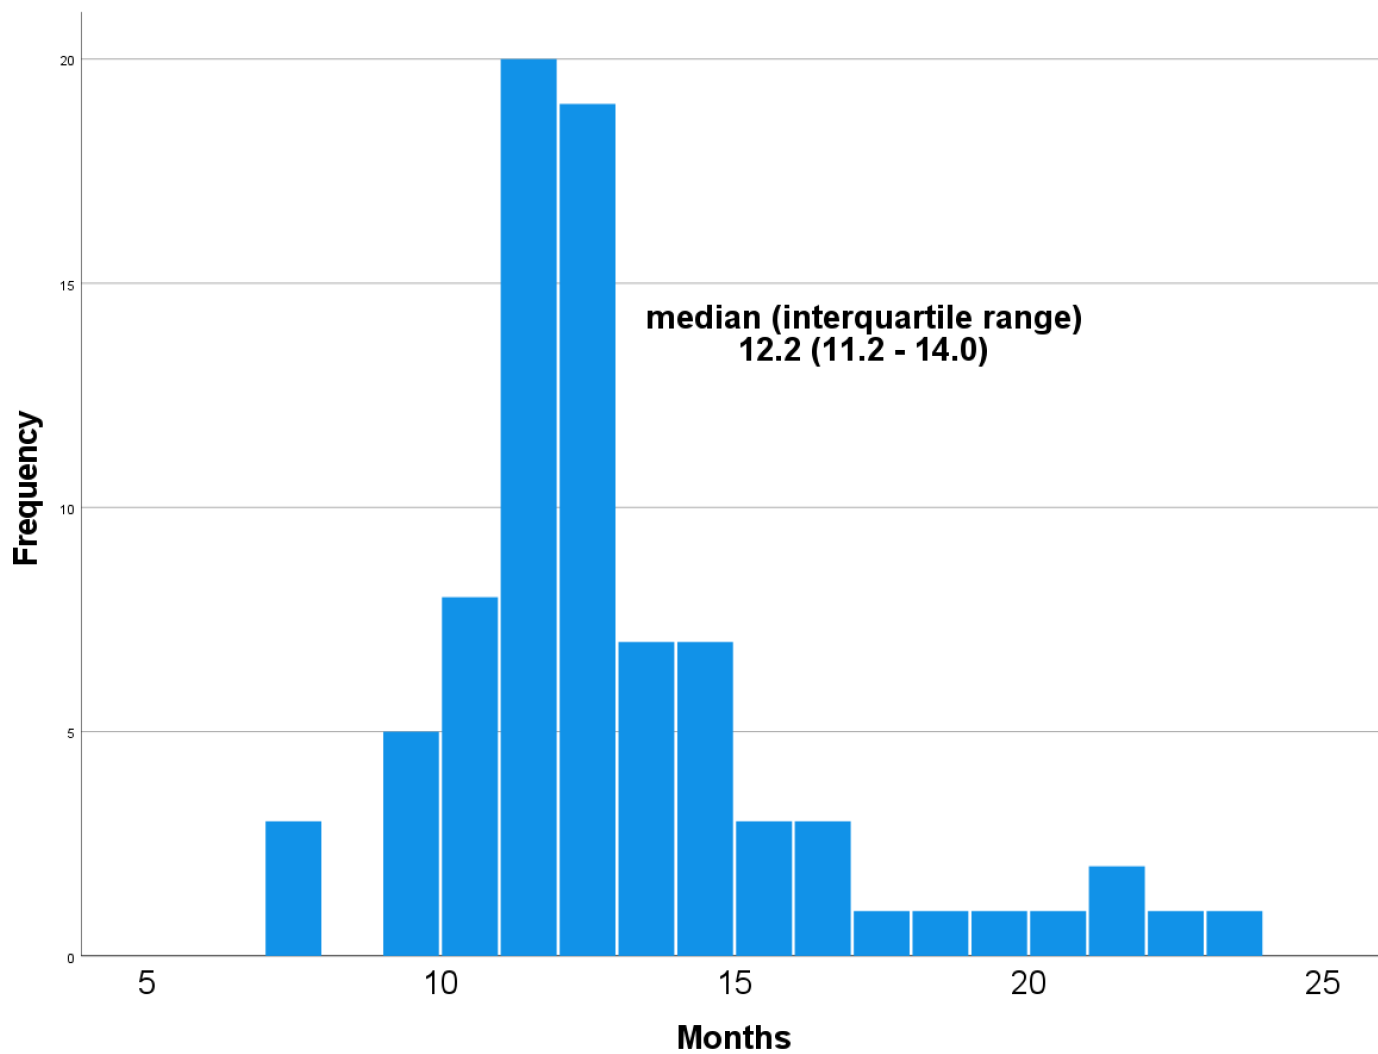

Supplement: lupus-2021-000489supp001.pdf [file lupus-2021-000489supp001.pdf]

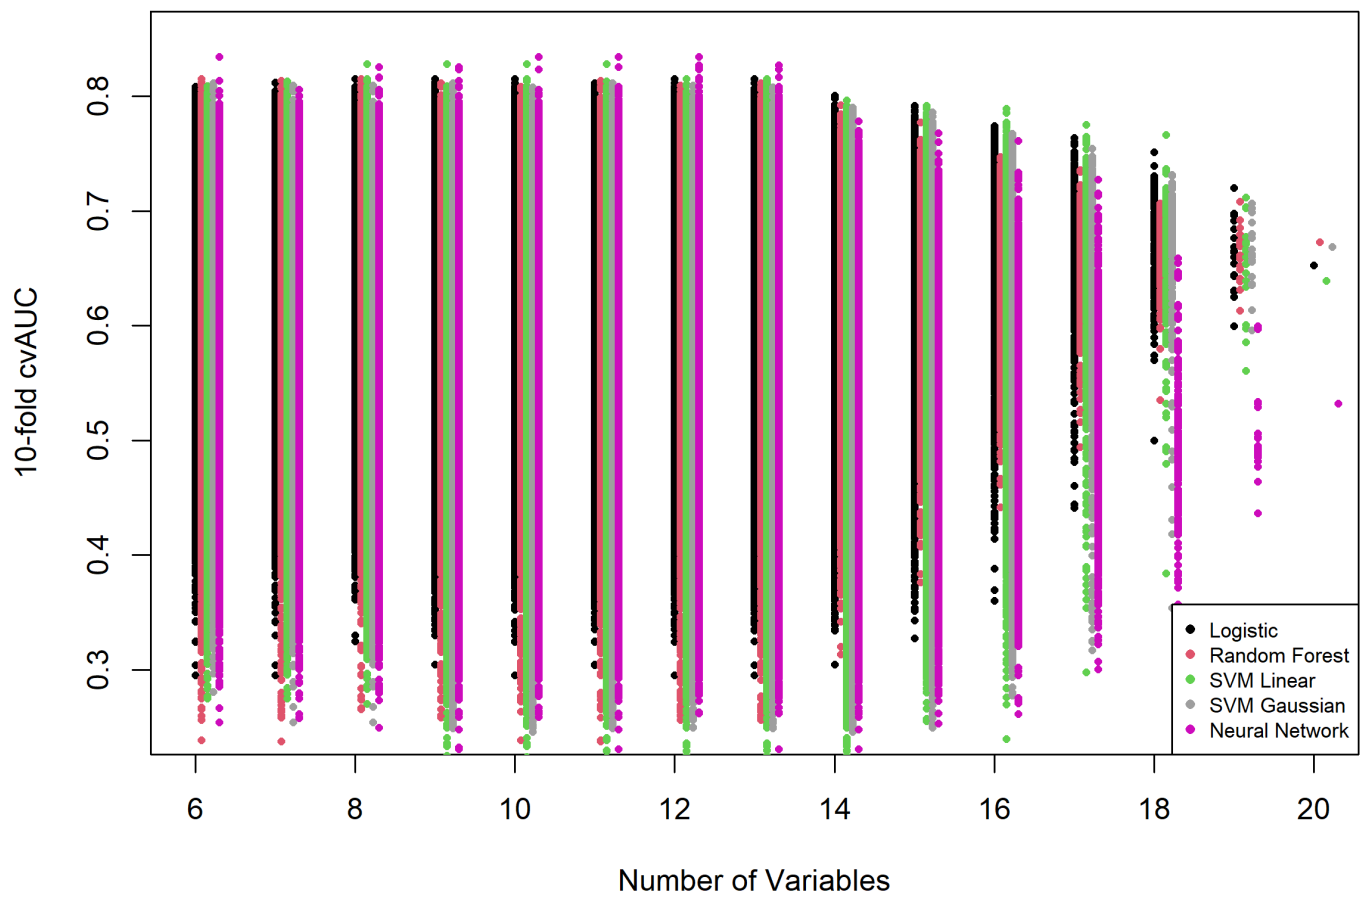

Supplement: lupus-2021-000489supp002.pdf [file lupus-2021-000489supp002.pdf]
