# Supplementary figures and images for: Development of a lupus nephritis suboptimal response prediction tool using renal histopathological and clinical laboratory variables at the time of diagnosis
Source: HighWire-hosted journal article supplement (doi:10.1136/lupus-2021-000489), 2021-08-01

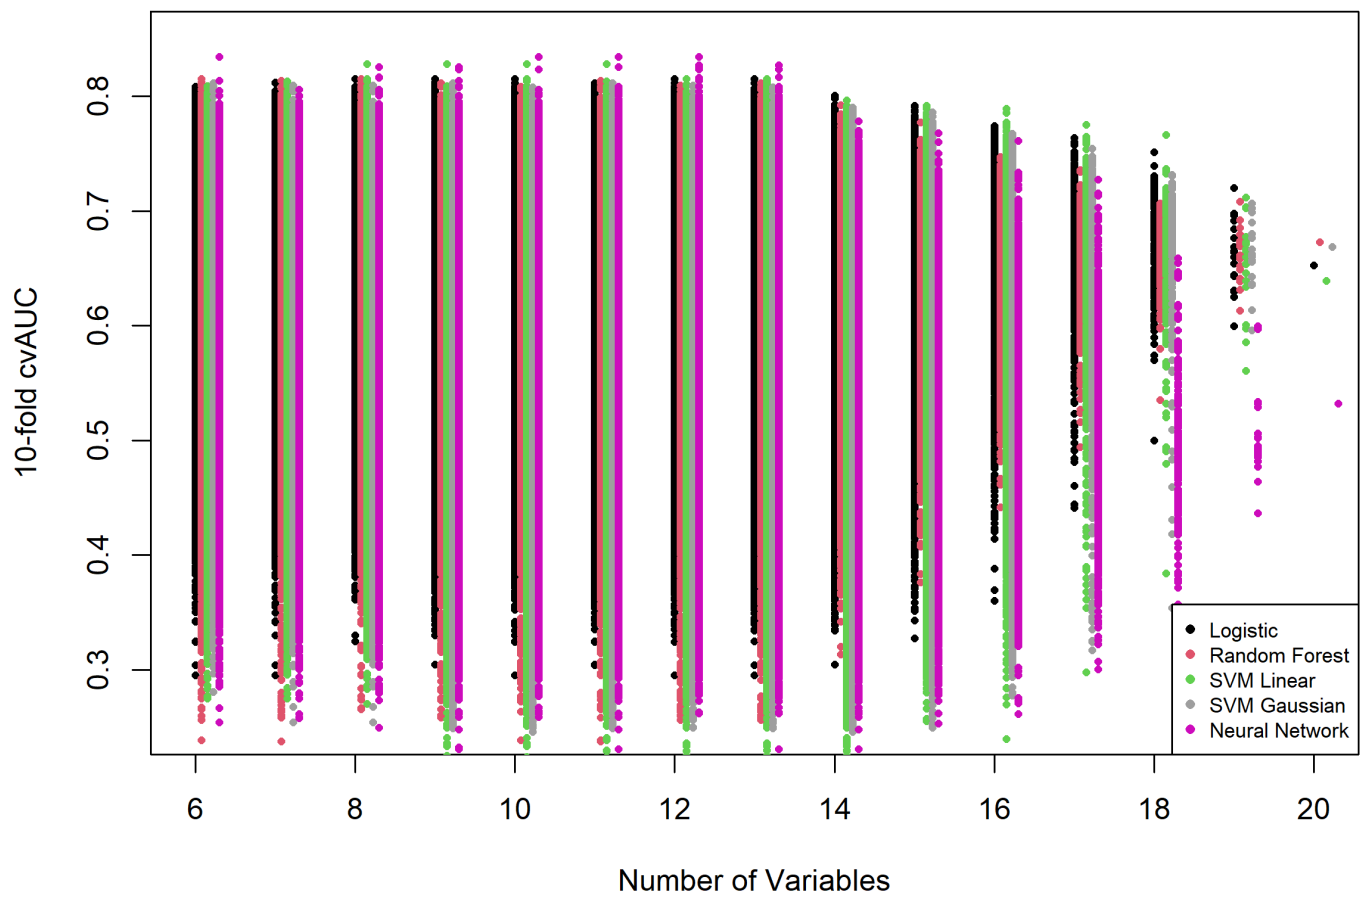

Supplement: lupus-2021-000489supp002_data_supplement.pdf [file lupus-2021-000489supp002_data_supplement.pdf]
